# Supplementary material for: Protocol for an HTA report: Does therapeutic writing help people with long-term conditions? Systematic review, realist synthesis and economic modelling
Source: PubMed Central journal article supplement — BMJ Open. 2014 Feb 18;4(2):e004377. doi: 10.1136/bmjopen-2013-004377 (PMC3932001; doi:10.1136/bmjopen-2013-004377), 2014-02-18
Supplement: bmjopen-2013-004377.reviewer_comments.pdf [file bmjopen-2013-004377.reviewer_comments.pdf]

## PEER REVIEW HISTORY

BMJ Open publishes all reviews undertaken for accepted manuscripts. Reviewers are asked to complete a checklist review form ([see an example](#)) and are provided with free text boxes to elaborate on their assessment. These free text comments are reproduced below. Some articles will have been accepted based in part or entirely on reviews undertaken for other BMJ Group journals. These will be reproduced where possible.

### ARTICLE DETAILS

|                            |                                                                                                                                                                               |
|----------------------------|-------------------------------------------------------------------------------------------------------------------------------------------------------------------------------|
| <b>TITLE (PROVISIONAL)</b> | Protocol for an HTA report: Does therapeutic writing help people with long term conditions? Systematic review, realist synthesis and economic modelling                       |
| <b>AUTHORS</b>             | Meads, Catherine; PerezNyssen, Olga; Wong, Geoff; Steed, Liz; Bourke, Liam; Ross, Carol; Hayman, Sheila; Field, Victoria; Lord, Joanne; Greenhalgh, Trisha; Taylor, Stephanie |

### VERSION 1 - REVIEW

|                        |                                                                          |
|------------------------|--------------------------------------------------------------------------|
| <b>REVIEWER</b>        | Kay Wilhelm<br>University of NSW/St Vincent's Hospital, Sydney Australia |
| <b>REVIEW RETURNED</b> | 11-Dec-2013                                                              |

|                         |                                                                                                                                                                                                                                                                                                                                                                                                                                                                                                                                                                                                                                                                                                                                                                                                                                                                                   |
|-------------------------|-----------------------------------------------------------------------------------------------------------------------------------------------------------------------------------------------------------------------------------------------------------------------------------------------------------------------------------------------------------------------------------------------------------------------------------------------------------------------------------------------------------------------------------------------------------------------------------------------------------------------------------------------------------------------------------------------------------------------------------------------------------------------------------------------------------------------------------------------------------------------------------|
| <b>GENERAL COMMENTS</b> | <p>The paper sets out a research plan for assessing studies on expressive writing. Interestingly, there is a significant contribution from a health economics viewpoint.</p> <p>It is very thorough, as times a bit dense, but certainly comprehensive. The authors spell out their definitions, inclusion/exclusion criteria, methods for evaluating data and timeline. It provides a good framework for others venturing into studies of this nature.</p> <p>There are some typos which I expect would be picked up by your editors.</p> <p>I noticed '.' missing after obesity on p8, non writing is one word in Table 1</p> <p>A comprehensive review of how they will undertake a large and ambitious project. I hope this throws some light on HOW expressive writing works but the findings will depend on what is published. I will await the findings with interest!</p> |
|-------------------------|-----------------------------------------------------------------------------------------------------------------------------------------------------------------------------------------------------------------------------------------------------------------------------------------------------------------------------------------------------------------------------------------------------------------------------------------------------------------------------------------------------------------------------------------------------------------------------------------------------------------------------------------------------------------------------------------------------------------------------------------------------------------------------------------------------------------------------------------------------------------------------------|
